# Supplementary material
Source: Springer Nature journal article supplement (https://www.springermedizin.de/resource/supplementary/12885_2010_2641_MOESM6_ESM.pdf/9461602)

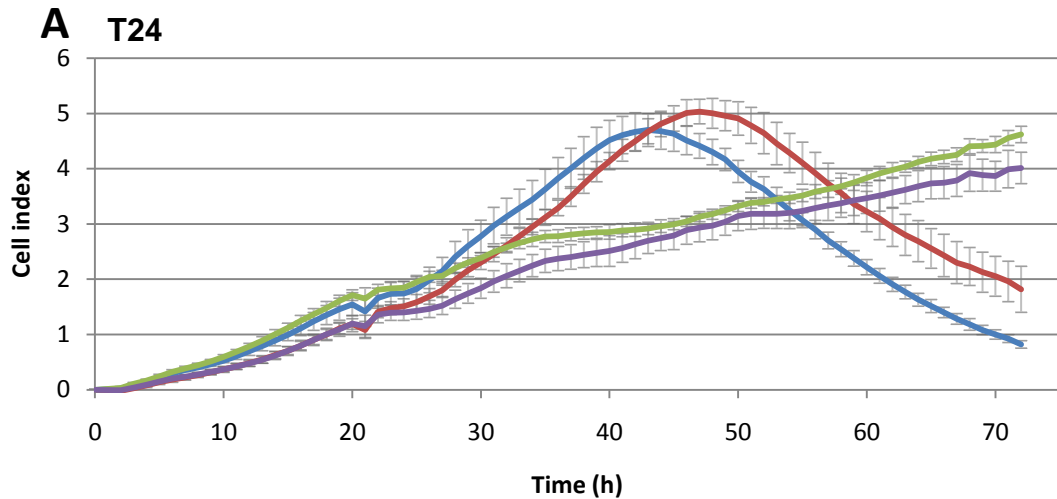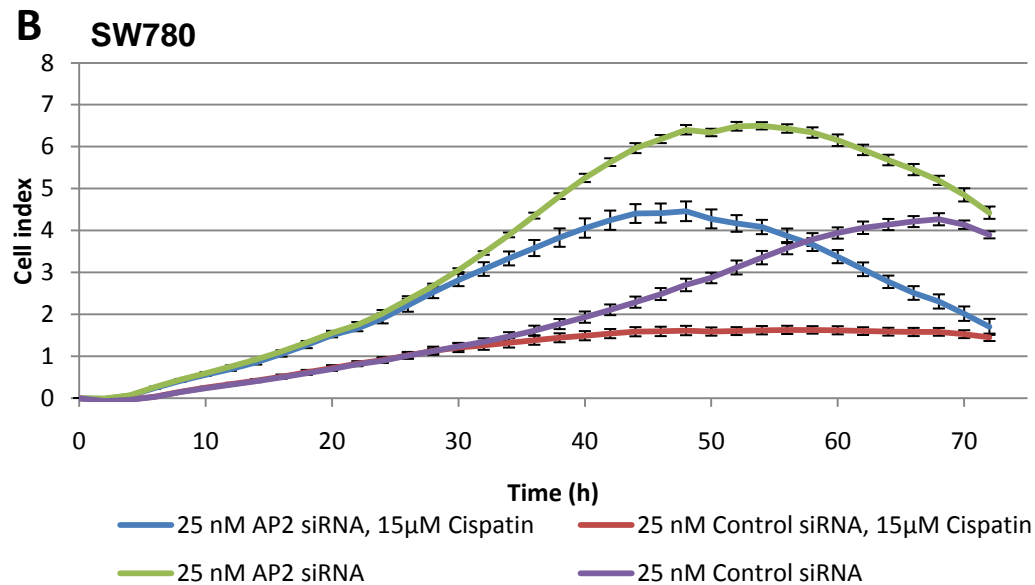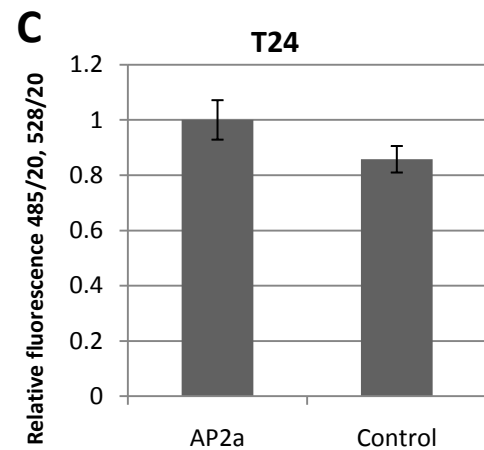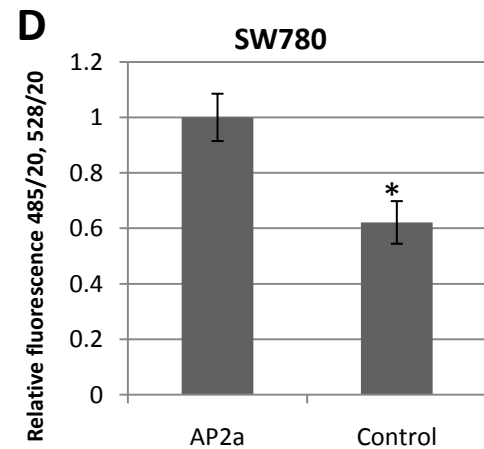

Supplement: MOESM6 [file 9461602]
